# Supplementary material for: Fish Larvae Response to Biophysical Changes in the Gulf of California, Mexico (Winter-Summer)
Source: Hindawi journal article supplement (doi:10.1155/2013/176760), 2013-01-01
Supplement: f1 [file 176760.f1.doc]

| Supplementary Data: Systematic list of the fish larvae collected in the Gulf of California. Survey during winter (GOLCA0701, CGC0503) and summer (GOLCA0707, CGC0509) of 2005 and 2007. Abundance values listed in each cruise are referred to relative abundance (%). Faunistic affinity (AF): tropical (tr); subtropical (st); temperate (tm); subarctic (sa); wide distribution in the Eastern Pacific (wd). Habitat (Hab): shallow-demersal (sd); deep-demersal (dd); coastal-pelágico (cp); oceanic-epipelagic (op); mesopelagic (mp); batipelagic (bp). | | | | | | | |
| --- | --- | --- | --- | --- | --- | --- | --- |
|  |  | GOLCA  0701 | CGC  0503 | GOLCA  0707 | CGC  0509 | AF | Hab |
| FAMILIA | ESPECIE | (%) | (%) | (%) | (%) |  |  |
| ALBULIDAE | *Albula* spp. |  | 0.1 |  | 1.4 | tr | sd |
|  | *Albula* *vulpes* | 0.1 |  | 0.1 |  | st | sd |
| NOTACANTHIDAE | Notacanthidae spp |  |  |  | 0.7 |  | dd |
|  | *Notacanthus* *chemnitzi* |  |  |  | 0.1 | st | dd |
| COLOCONGRIDAE | *Leptocephalus* *giganteus* |  |  |  | 0.1 | st | dd |
| O. ANGILIFORMES | Angiliforme sp 1 |  |  | 0.6 |  |  |  |
|  | Angiliforme sp 2 |  |  | < 0.1 |  |  |  |
|  | Angiliforme sp 3 |  |  | 0.1 |  |  |  |
|  | Angiliforme sp 9 |  |  | < 0.1 |  |  |  |
|  | Angiliforme a sp 10 |  |  | < 0.1 |  |  |  |
|  | Angiliforme sp 11 |  |  | < 0.1 |  |  |  |
|  | Angiliforme sp 14 |  |  | < 0.1 |  |  |  |
|  | Angiliforme sp 15 |  |  | 0.1 |  |  |  |
|  | Angiliforme sp 16 |  |  | 0.1 |  |  |  |
|  | Angiliforme sp 17 |  |  | < 0.1 |  |  |  |
| OPHICHTHIDAE | *Ophichthus* sp. 3 |  |  | < 0.1 |  |  |  |
|  | *Ophichthus* *zophochir* |  | 0.1 | 0.1 |  | st | sd |
| CONGRIDAE | *Ariosoma* *gilberti* | < 0.1 | 0.1 |  |  | tr | sd |
|  | Congridae spp. |  | < 0.1 |  |  |  |  |
|  | *Paraconger* *californiensis* | < 0.1 |  |  |  | tr | sd |
|  | *Rhynchoconger* *nitens* |  | < 0.1 |  |  | tr | sd |
| CLUPEIDAE | *Opisthonema* *libertate* |  |  | 25.6 |  | tr | cp |
|  | *Opisthonema* spp. |  | < 0.1 |  | 38.5 | tr | cp |
|  | *Sardinops* *sagax* | 8.3 | 0.3 |  |  | st | cp |
| DUSSUMIERIIDAE | *Etrumeus* *teres* | 1.9 | 0.4 |  |  | st | cp |
| ENGRAULIDAE | *Anchoa* spp. |  |  |  | 2.0 |  | cp |
|  | *Cetengraulis* *mysticetus* |  |  | 36.5 |  | st | cp |
|  | *Engraulis* *mordax* | 38.0 | 9.1 |  |  | st | cp |
| CHANIDAE | *Chanos* *chanos* |  |  |  | 0.1 | tr | cp |
| ARGENTINIDAE | *Argentina* *sialis* | 0.2 | < 0.1 | < 0.1 |  | st | mp |
| BATHYLAGIDAE | *Bathylagoides* *wesethi* |  | 0.1 |  | < 0.1 | st | mp |
|  | Bathylagidae spp. |  | < 0.1 |  |  |  |  |
|  | *Leuroglossus* *stilbius* | 24.3 | 5.4 |  |  | st | mp |
| GONOSTOMATIDAE | *Diplophos* *taenia* |  | 0.1 |  | < 0.1 | st | bp |
| PHOSICHTHYIDAE | *Vinciguerria* *lucetia* | 2.1 | 37.6 | 1.2 | < 0.1 | tr | mp |
| STOMIIDAE | *Stomias* *atriventer* | 0.3 | 0.1 |  |  | st | bp |
| AULOPIDAE | *Aulopus* *bajacali* |  | 0.1 |  |  | tr | dd |
| SCOPELARCHIDAE | *Scopelarchoides* *nicholsi* |  | 0.1 |  |  | st | bp |
|  | Gonostomatidae sp. 1 |  | < 0.1 |  |  |  |  |
|  | *Cyclothone* spp. |  | 0.1 |  |  |  |  |
| SYNODONTIDAE | *Synodus* *lucioceps* | 0.1 | < 0.1 | 0.6 |  | st | sd |
|  | *Synodus* sp. 1 |  |  | 0.1 |  |  |  |
|  | *Synodus* sp. 2 |  |  | < 0.1 |  |  |  |
| MYCTOPHIDAE | *Benthosema* *panamense* | 0.7 | 8.5 | 12.9 | 3.8 | tr | mp |
|  | *Diaphus* *pacificus* |  | 0.1 |  |  | st | mp |
|  | *Diogenichthys* *laternatus* | 8.5 | 26.5 | < 0.1 | 0.1 | st | mp |
|  | *Hygophum* *atratum* | < 0.1 | 3.5 | < 0.1 |  | tr | bp |
|  | *Lampanyctus* *parvicauda* |  | < 0.1 |  |  | tr | mp |
|  | *Nannobrachium* *idostigma* |  | < 0.1 |  |  | st | mp |
|  | *Triphoturus* *mexicanus* | 1.3 | 1.6 | 4.5 |  | st | mp |
| BREGMACEROTIDAE | *Bregmaceros* *bathymaster* | 1.2 | 0.2 | 0.1 | 0.1 | tr | cp |
|  | *Bregmaceros* sp. 1 |  | 0.3 |  |  |  | cp |
| MACROURIDAE | *Caelorinchus* *scaphopsis* | 0.4 |  |  |  | st | mp |
|  | Macrouridae sp. 1 | < 0.1 |  |  |  |  |  |
|  | Macrouridae sp. 2 | 0.1 |  |  |  |  |  |
|  | *Coryphaenoides* sp. |  | < 0.1 |  |  |  |  |
|  | *Nezumia* spp. |  | 0.2 |  |  |  |  |
| MORIDAE | *Physiculus* *nematopus* | 0.1 | 0.1 |  |  | tr | mp |
| MERLUCCIIDAE | *Merluccius* *productus* | 0.2 |  |  |  | tm | dd |
| OPHIDIIDAE | *Cherublemma* *emmelas* | 0.1 | 0.1 |  |  | tr | dd |
|  | *Chilara* *taylori* |  | 0.1 |  |  | tm | dd |
|  | *Lepophidium* *negropinna* |  |  | 0.2 |  | tr | sd |
|  | *Lepophidium* sp. | < 0.1 |  |  |  |  | sd |
|  | *Lepophidium* *stigmatistium* |  | 0.1 |  |  | st | sd |
|  | *Ophidion* *scrippsae* |  | 0.2 | < 0.1 |  | tm | sd |
|  | *Ophidion* sp. 1 | < 0.1 |  |  |  |  | sd |
|  | Ophidiidae sp. 1 | < 0.1 |  |  |  |  |  |
|  | Ophidiidae spp. |  | < 0.1 |  | 0.1 |  |  |
| CARAPIDAE | *Echiodon* *exsilium* |  |  | < 0.1 |  | tr | sd |
| LOPHIIDAE | *Lophiodes* *spilurus* |  |  | < 0.1 |  | tr | dd |
| OGCOCEPHALIDAE | Ogcocephalidae sp. 1 |  |  | < 0.1 |  |  |  |
| MELANOCETIDAE | *Melanocetus* *johnsoni* |  |  | < 0.1 |  | wd | bp |
| CERATIIDAE | Ceratiidae sp. 1 |  |  | < 0.1 |  |  |  |
| GIGANTACTINIDAE | *Gigantactis* sp. 1 |  |  | < 0.1 |  |  | bp |
| LINOPHRYNIDAE | *Boroprhyne* *apogon* |  |  | < 0.1 |  | tr | bp |
| HEMIRAMPHIDAE | *Hyporhamphus* *rosae* |  |  | < 0.1 |  | st | cp |
|  | *Hyporhamphus* sp. |  |  |  | 0.2 |  | cp |
|  | *Oxyporhamphus* *micropterus* |  |  |  | 0.8 | tr | cp |
| EXOCOETIDAE | *Cheilopogon* *hubbsi* |  |  |  | 1.6 | st | cp |
|  | *Fodiator* *rostratus* |  |  |  | < 0.1 | tr | cp |
|  | *Hirundichthys* spp. |  |  |  | 0.2 |  | cp |
|  | *Prognichthys* *tringa* |  |  |  | 0.1 | tr | cp |
| MELAMPHAIDAE | Melamphaidae spp. |  | < 0.1 |  | 0.4 |  |  |
|  | *Scopelogadus* *mizolepis* |  | < 0.1 |  |  | st | bp |
| HOLOCENTRIDAE | *Myripristis leiognathos* |  |  |  | 0.2 | tr | sd |
|  | *Sargocentron* *suborbitalis* |  |  |  | < 0.1 | tr | sd |
| FISTULARIIDAE | *Fistularia* *corneta* |  |  | 0.2 |  | tr | sd |
| SYNGNATHIDAE | *Syngnathus* sp. 1 | < 0.1 |  |  |  |  | sd |
| SCORPAENIDAE | *Pontinus* sp. 1 | 0.1 |  | < 0.1 |  |  | sd |
|  | *Pontinus* spp. |  |  |  | 0.2 |  | sd |
|  | *Sebastes* sp. 3 | 0.5 |  |  |  |  |  |
|  | *Sebastes* sp. 6 | < 0.1 |  |  |  |  |  |
|  | *Sebastes* spp. |  |  |  | 0.3 |  |  |
|  | *Scorpaena* *guttata* |  |  | 0.1 | < 0.1 | tm | sd |
|  | *Scorpaena* spp. |  |  |  | < 0.1 |  |  |
|  | *Scorpaenodes* *xyris* | 0.1 | 0.1 | < 0.1 |  | tr | sd |
| TRIGLIDAE | *Prionotus* *ruscarius* | 0.1 |  |  | < 0.1 | tr | sd |
|  | *Prionotus* sp. 1 |  |  | < 0.1 |  |  | sd |
|  | *Prionotus* *stephanophrys* |  |  | 0.1 |  | st | sd |
| SERRANIDAE | *Diplectrum* sp. 1 |  | 0.1 | < 0.1 |  | tr | sd |
|  | *Diplectrum* sp. 2 |  |  | < 0.1 |  | tr | sd |
|  | *Diplectrum* spp. |  |  |  | 0.1 | tr | sd |
|  | *Epinephelus* sp. 1 |  |  | 0.1 |  |  |  |
|  | *Hemanthias* *signifer* |  |  | < 0.1 |  | st | sd |
|  | *Paralabrax* *auroguttatus* |  |  | < 0.1 |  | tr | sd |
|  | *Paralabrax* *maculatofasciatus* | < 0.1 |  | 0.1 |  | st | sd |
|  | *Paralabrax* *nebulifer* |  |  | 0.1 |  | st | sd |
|  | *Paralabrax* sp. 1 |  |  | < 0.1 |  |  | sd |
|  | *Paralabrax* sp. 2 |  |  | < 0.1 |  |  | sd |
|  | *Pronotogrammus* *eos* |  | < 0.1 |  |  | tr | dd |
|  | *Pronotogrammus* *multifasciatus* | < 0.1 | 0.1 | < 0.1 |  | st | sd |
|  | Serranidae sp. 1 |  | 0.1 | < 0.1 |  |  | sd |
|  | *Serranus* sp. 1 |  |  | 0.2 |  |  | sd |
|  | *Serranus* sp. 2 |  |  | < 0.1 |  |  | sd |
|  | *Serranus* sp. 4 |  |  | 0.1 |  |  | sd |
| PRIACANTHIDAE | Priacanthidae spp |  |  |  | 0.1 |  | sd |
|  | *Pristigenys* *serrula* |  |  |  | 0.2 | tr | sd |
| APOGONIDAE | *Apogon* sp. 1 |  |  | < 0.1 |  |  | sd |
|  | Apogonidae sp. 1 |  |  | < 0.1 |  |  | sd |
| MALACANTHIDAE | *Caulolatilus* *princeps* |  | < 0.1 |  |  | st | sd |
|  | *Caulolatilus* sp. 1 | 0.1 |  |  |  |  | sd |
| CARANGIDAE | Carangidae sp. 1 |  |  | < 0.1 |  |  | cp |
|  | Carangidae spp. |  |  |  | 1.4 |  | cp |
|  | *Caranx* *caballus* |  |  | 0.2 | 2.3 | st | cp |
|  | *Caranx* sp. 1 |  | 0.1 |  |  |  | cp |
|  | *Caranx* spp. |  |  |  | 0.7 |  | cp |
|  | *Chloroscombrus* *orqueta* |  | < 0.1 | < 0.1 | < 0.1 | st | cp |
|  | *Decapterus* sp. 1 |  |  | 0.2 |  | tr | cp |
|  | *Decapterus* spp. |  |  |  | 1.6 | tr | cp |
|  | *Gnathanodon* *speciosus* |  |  | 0.1 |  | tr | cp |
|  | *Oligoplites* *saurus* |  |  | 1.5 | 0.5 | st | cp |
|  | *Oligoplites* sp. |  |  |  | 0.2 | tr | cp |
|  | *Selar* *crumenophthalmus* |  |  | 0.2 |  | st | cp |
|  | *Selene* *peruviana* |  |  | 0.1 |  | tr | cp |
|  | *Seriola* *lalandi* |  |  | < 0.1 |  | wd | cp |
|  | *Seriola* spp. |  | 0.1 |  | 0.1 | wd | cp |
|  | *Trachinotus* *kennedyi* |  |  |  | 0.1 | tr | cp |
|  | *Trachurus* *symmetricus* | 0.9 | < 0.1 | < 0.1 |  | st | op |
| CORYPHAENIDAE | *Coryphaena* *equiselis* |  |  |  | 0.1 | st | op |
|  | *Coryphaena* *hippurus* |  |  | < 0.1 |  | st | op |
| LUTJANIDAE | *Lutjanus* *argentiventris* |  |  | < 0.1 | 0.1 | tr | sd |
|  | *Lutjanus* *novenfasciatus* |  |  |  | 0.4 | tr | sd |
|  | *Lutjanus* *peru* |  |  | 0.1 | 0.9 | tr | sd |
|  | *Lutjanus* spp. |  |  |  | 0.6 | tr | sd |
| GERREIDAE | Gerreidae sp 1 |  |  | < 0.1 |  |  | sd |
|  | Gerreidae spp. |  |  |  | 19.7 |  | sd |
|  | *Eucinostomus* *currani* |  |  | 0.6 |  | tr | sd |
|  | *Eucinostomus* *dowii* |  |  | 1.1 |  | tr | sd |
| HAEMULIDAE | *Anisotremus* *davidsonii* |  |  | 0.1 |  | st | sd |
|  | Haemulidae spp. |  |  |  | 1.4 |  |  |
| SCIAENIDAE | *Cynoscion* spp. |  |  |  | < 0.1 |  | sd |
|  | *Micropogonias* spp. |  |  |  | < 0.1 |  | sd |
|  | Sciaenidae sp. 1 |  |  | 1.2 |  |  |  |
|  | Sciaenidae sp. 2 |  |  | 0.4 |  |  |  |
|  | Sciaenidae sp. 3 |  |  | < 0.1 |  |  |  |
|  | Sciaenidae sp. 4 |  |  | < 0.1 |  |  |  |
|  | Sciaenidae sp. 5 |  |  | < 0.1 |  |  |  |
|  | Scianidae spp |  |  |  | 0.1 |  |  |
|  | *Umbrina* *roncador* |  | < 0.1 |  |  | st | sd |
|  | *Umbrina* sp. 1 | 0.8 |  |  |  |  | sd |
| MULLIDAE | *Mullidae* spp. |  |  |  | 2.3 |  | sd |
|  | *Mulloidichthys* *dentatus* |  |  | < 0.1 |  | tr | sd |
| KYPHOSIDAE | *Kyphosus* sp. | < 0.1 | < 0.1 |  |  |  | sd |
| CHAETODONTIDAE | *Chaetodon* *humeralis* |  |  |  | < 0.1 | tr | sd |
| MUGILIDAE | *Mugil* *cephalus* |  |  | < 0.1 |  | st | sd |
|  | *Mugil* *curema* |  |  |  | < 0.1 | st | sd |
| POMACENTRIDAE | *Abudefduf* *troschelii* |  |  | 0.1 |  | tr | sd |
|  | *Chromis* sp 1 |  |  | < 0.1 |  | tr | sd |
|  | Pomacentridae sp. 1 |  |  | < 0.1 |  |  | sd |
|  | Pomacentridae sp. 2 |  |  | < 0.1 |  |  | sd |
|  | *Stegastes* *rectifraenum* |  |  | 0.1 | < 0.1 | st | sd |
| SCARIDAE | *Scarus* sp. |  |  |  | < 0.1 | tr | sd |
| LABRISOMIDAE | *Haliochoeres* *semicinctus* |  |  | 0.7 |  | st | sd |
|  | *Haliochoeres* sp. 1 |  |  | < 0.1 |  |  |  |
|  | *Labrisomus* *xanti* |  | 0.1 |  |  | tr | sd |
|  | Labrisomidae sp. |  | < 0.1 |  |  |  | sd |
|  | Labrisomidae sp. 1 |  |  | < 0.1 |  |  | sd |
| CLINIDAE | Clinidae sp. 1 |  |  | < 0.1 |  |  |  |
|  | Clinidae sp. 2 |  |  | 0.2 |  |  |  |
| CHAENOPSIDAE | Chaenopsidae sp. |  | 0.1 |  |  |  |  |
| BLENNIIDAE | *Hypsoblennius* spp. |  |  | < 0.1 |  | st | sd |
|  | *Ophioblennius* *steindachneri* |  | < 0.1 |  |  | tr | sd |
| ELEOTRIDAE | Eleotridae sp. 1 |  | 0.3 | 0.1 |  |  |  |
|  | *Erotelis* *armiger* |  |  | < 0.1 |  | tr | sd |
| GOBIIDAE | *Rhinogobiops* *nicholsii* |  | 0.1 |  |  | st | sd |
|  | Gobiidae sp. 1 |  |  | 0.1 |  |  | sd |
|  | Gobiidae sp. 2 | < 0.1 |  | 0.5 |  |  | sd |
|  | Gobiidae sp. 4 | < 0.1 |  |  |  |  | sd |
|  | Gobiidae sp. 3 |  |  | 1.5 |  |  | sd |
|  | Gobiidae sp. 5 |  |  | < 0.1 |  |  | sd |
|  | Gobiidae sp. 6 | 0.1 |  |  |  |  | sd |
|  | Gobiidae sp. 7 |  |  | 0.2 |  |  | sd |
|  | Gobiidae spp. |  | 0.5 |  | 1.0 |  | sd |
|  | *Lythrypnus* *zebra* |  | 0.1 |  |  | st | sd |
| MICRODESMIDAE | *Clarkichthys* *bilineatus* |  |  | 0.2 |  | tr | sd |
|  | Microdesmidae spp. |  |  |  | 0.2 |  | sd |
|  | *Microdesmus* sp. |  |  |  | < 0.1 |  | sd |
| SPHYRAENIDAE | *Sphyraena* *ensis* |  |  | < 0.1 | 0.2 | tr | cp |
| TRICHIURIDAE | *Lepidopus* *fitchi* |  | < 0.1 | < 0.1 | 0.1 | st | mp |
|  | *Trichiurus* *lepturus* |  |  | 0.1 |  | st | mp |
| SCOMBRIDAE | *Auxis* sp. 2 |  |  | 1.5 |  | st | op |
|  | *Auxis* spp. |  |  |  | 2.3 | st | op |
|  | *Euthynnus* *lineatus* |  |  |  | 0.4 | tr | op |
|  | *Katsuwonus* *pelamis* |  |  |  | 2.2 | st | op |
|  | *Scomber* *japonicus* | 2.4 | 1.7 |  |  | st | cp |
|  | Scombridae sp. |  |  |  | 0.1 |  |  |
|  | *Scomberomorus* *sierra* |  |  | 1.3 | 0.2 | tr | cp |
|  | *Scomberomorus* sp. |  |  |  | <0.1 | tr | cp |
|  | *Thunnus* sp. 1 |  |  | 1.2 |  | st | op |
| ISTIOPHORIDAE | *Kajikia* *audax* |  |  |  | 0.3 | st | op |
| NOMEIDAE | *Cubiceps* *pausiradiatus* |  |  |  | 2.8 | tr | mp |
|  | Nomeidae sp. 1 |  | 0.2 |  |  |  |  |
|  | Nomeidae spp. |  |  |  | 0.1 |  |  |
|  | *Psenes* *pellucidus* |  | 0.1 |  |  | st | mp |
|  | *Psenes* *sio* | 0.1 | < 0.1 |  | < 0.1 | tr | op |
| PARALICHTHYIDAE | *Citharichthys* *fragilis* | 5.7 |  |  | 0.6 | st | sd |
|  | *Citharichthys* *platophrys* | 0.1 |  |  |  | tr | sd |
|  | *Citharichthys* spp. |  |  |  | 0.1 |  | sd |
|  | *Citharichthys* *xanthostigma* |  |  |  | 0.1 | st | sd |
|  | *Cyclopsetta* sp. 1 |  | < 0.1 |  | 0.8 | tr | sd |
|  | *Etropus* *crossotus* |  | < 0.1 | < 0.1 |  | st | sd |
|  | *Hippoglossina* *stomata* | 0.3 |  |  |  | st | sd |
|  | Paralichthyidae sp. 1 |  |  | < 0.1 |  |  |  |
|  | *Paralichthys* *californicus* | 0.2 |  |  |  | st | sd |
|  | *Syacium* *ovale* |  |  | 0.5 | 1.7 | tr | sd |
|  | *Syacium* sp. |  |  |  | 0.1 |  | sd |
| BOTHIDAE | *Bothus* *leopardinus* | 0.1 | < 0.1 | < 0.1 | 0.1 | tr | sd |
|  | Bothidae sp. 1 |  |  | < 0.1 |  |  |  |
|  | *Monolene* *asaedai* | < 0.1 | 0.1 |  |  | tr | sd |
|  | *Perissias* *taeniopterus* | < 0.1 |  |  |  | tr | sd |
| PLEURONECTIDAE | *Pleuronichthys* *verticalis* | 0.1 | < 0.1 |  |  | st | sd |
| ACHIRIDAE | *Achirus* *mazatlanus* |  |  |  | < 0.1 | tr | sd |
| CYNOGLOSSIDAE | *Symphurus* *atramentatus* |  | < 0.1 | < 0.1 |  | tr | sd |
|  | *Symphurus* *callopterus* |  |  | < 0.1 |  | tr | sd |
|  | *Symphurus* *oligomerus* |  |  | < 0.1 |  | tr | sd |
|  | *Symphurus* sp. 2 | 0.1 |  |  |  | tr | sd |
|  | *Symphurus* sp. 4 |  |  | < 0.1 |  | tr | sd |
|  | *Symphurus* spp. |  |  |  | 0.1 | tr | sd |
|  | *Symphurus* *williamsi* | < 0.1 | 0.1 | 0.8 | 0.7 | tr | sd |
| BALISTIDAE | *Balistes* *polylepis* |  |  | 0.8 | 1.7 | st | sd |
|  | *Sufflamen* *verres* |  |  |  | 0.1 | tr | sd |
| DIODONTIDAE | *Sphoeroides* *lobatus* |  |  | < 0.1 |  | st | sd |
|  | *Diodon* spp |  |  |  | 0.1 | st | Sd |
